# Supplementary material
Source: PubMed Central journal article supplement (PMC1965547)
Supplement: pnas_0701862104_1.pdf [file pnas_0701862104_1.pdf]

**Table 1.** Weather stations run by the *Servicio Meteorológico Nacional* in the Mexican Pacific slopes, from where our dataset was developed

| Name                       | Lat. N  | Long. W  | Altitude | Start date | End date | Years |
|----------------------------|---------|----------|----------|------------|----------|-------|
| <b>Baja California</b>     |         |          |          |            |          |       |
| Bahía de los Ángeles       | 28° 36' | 113° 33' | 4        | Sep-1953   | Dec-2003 | 46    |
| Bataques                   | 32° 33' | 115° 04' | 23       | Jul-1948   | Mar-2003 | 54    |
| Chapala                    | 29° 29' | 114° 21' | 640      | Dec-1953   | Dec-2002 | 49    |
| El Arco                    | 28° 00' | 113° 25' | 300      | Oct-1953   | Nov-2002 | 49    |
| El Barril                  | 28° 18' | 112° 52' | 50       | Jan-1961   | Dec-2002 | 42    |
| El Socorro                 | 30° 19' | 115° 49' | 26       | Aug-1956   | Aug-2002 | 44    |
| Mexicali                   | 32° 39' | 115° 27' | 4        | Feb-1944   | Dec-2002 | 53    |
| Presa Rodríguez            | 32° 26' | 116° 54' | 120      | Jan-1929   | Dec-2003 | 69    |
| Rosarito                   | 28° 28' | 114° 01' | 125      | Aug-1958   | Nov-2002 | 41    |
| San Felipe                 | 31° 00' | 114° 50' | 22       | May-1948   | Dec-2002 | 53    |
| Santa Catarina Sur         | 29° 43' | 115° 07' | 270      | May-1954   | Nov-2002 | 48    |
| Santa María del Mar        | 30° 24' | 115° 53' | 28       | Jul-1957   | Nov-2002 | 44    |
| Valle de Palmas            | 32° 22' | 116° 39' | 280      | Jan-1949   | Dec-2002 | 54    |
| Ensenada                   | 31° 53' | 115° 35' | 55       | Jan-1923   | Dec-2002 | 46    |
| El Progreso                | 29° 58' | 115° 11' | 517      | Aug-1973   | Nov-2002 | 29    |
| <b>Baja California Sur</b> |         |          |          |            |          |       |
| Bahía Tortugas             | 27° 41' | 114° 53' | 15       | Jan-1961   | Dec-2004 | 42    |
| Buenavista de Loreto       | 25° 07' | 111° 48' | 30       | Sep-1940   | Dec-2004 | 64    |
| Caduano                    | 23° 19' | 109° 56' | 180      | Feb-1942   | Dec-2004 | 63    |
| El Aguajito                | 24° 50' | 111° 07' | 200      | Jan-1961   | Dec-2004 | 44    |
| El Pilar                   | 24° 28' | 111° 00' | 90       | Mar-1942   | Dec-2004 | 61    |
| El Rosarito                | 26° 27' | 111° 38' | 122      | Jul-1941   | Dec-2004 | 64    |
| La Angostura               | 25° 03' | 111° 07' | 280      | Jan-1961   | Nov-2004 | 44    |
| La Poza Grande             | 25° 45' | 112° 02' | 25       | Jan-1941   | Dec-2004 | 64    |
| La Purísima                | 26° 10' | 112° 04' | 95       | Sep-1938   | Dec-2004 | 67    |
| Loreto                     | 26° 00' | 111° 20' | 10       | Aug-1938   | Dec-2004 | 64    |
| Mulegé                     | 26° 53' | 111° 59' | 35       | Jan-1922   | Dec-2004 | 77    |
| Pénjamo                    | 24° 23' | 111° 06' | 50       | Sep-1952   | Dec-2004 | 53    |
| San Bartolo                | 23° 44' | 109° 50' | 395      | Jan-1941   | Dec-2004 | 64    |
| San Jacinto                | 23° 14' | 110° 04' | 95       | Feb-1953   | Dec-2004 | 52    |
| San José del Cabo          | 23° 04' | 109° 42' | 40       | Dec-1926   | Dec-2004 | 69    |
| Santiago                   | 23° 28' | 109° 42' | 125      | Jan-1937   | Dec-2004 | 66    |
| Todos Santos               | 23° 27' | 110° 13' | 40       | Oct-1939   | Sep-2004 | 61    |
| La Paz                     | 24° 08' | 110° 20' | 16       | Oct-1945   | Dec-2004 | 53    |
| <b>Sonora</b>              |         |          |          |            |          |       |
| Agua Prieta                | 31° 19' | 109° 32' | 1,220    | Feb-1961   | May-2005 | 38    |
| Bacanuchi                  | 30° 35' | 110° 14' | 1,060    | Jan-1964   | Jul-2003 | 38    |
| Colonia Oaxaca             | 30° 43' | 109° 03' | 1,000    | Aug-1964   | May-2000 | 35    |

|                       |         |          |       |          |          |    |
|-----------------------|---------|----------|-------|----------|----------|----|
| El Orégano            | 29° 13' | 110° 42' | 272   | Jun-1941 | Jan-2005 | 62 |
| Atil                  | 30° 50' | 110° 36' | 306   | May-1927 | Jul-1999 | 64 |
| Imuris                | 30° 47' | 110° 52' | 826   | Feb-1938 | Oct-2004 | 58 |
| Minas Nuevas          | 27° 03' | 109° 00' | 480   | Feb-1927 | May-2005 | 68 |
| Mulatos               | 28° 38' | 108° 45' | 1,165 | Jan-1943 | Dec-2004 | 60 |
| Navojoa               | 27° 04' | 109° 26' | 54    | Jan-1922 | Oct-2004 | 56 |
| Presa La Angostura    | 30° 26' | 109° 23' | 860   | May-1932 | Jun-2001 | 63 |
| Quiriego              | 27° 31' | 109° 15' | 210   | Jul-1927 | May-2005 | 77 |
| Sahuaripa             | 29° 03' | 109° 14' | 460   | Aug-1942 | Nov-2004 | 61 |
| San Luis Rio Colorado | 32° 24' | 114° 42' | 27    | May-1949 | Jan-2003 | 39 |
| Sonoyta               | 31° 52' | 112° 51' | 398   | Nov-1948 | Jan-2005 | 55 |

---

### Sinaloa

|              |         |          |     |          |          |    |
|--------------|---------|----------|-----|----------|----------|----|
| Acatitan     | 24° 05' | 106° 40' | 130 | Jan-1961 | Sep-2004 | 40 |
| Culiacán     | 24° 49' | 107° 25' | 40  | Jan-1961 | Jul-2005 | 44 |
| Choix        | 26° 44' | 108° 20' | 225 | Jan-1953 | Nov-2004 | 52 |
| El Fuerte    | 26° 25' | 108° 37' | 84  | Jan-1955 | Jan-2005 | 49 |
| Elota        | 23° 58' | 106° 43' | 35  | Jan-1961 | Dec-1993 | 31 |
| El Varejonal | 25° 05' | 107° 23' | 131 | Jan-1961 | Jul-2005 | 44 |
| Huites       | 26° 53' | 108° 21' | 259 | Jan-1961 | Jul-2004 | 42 |
| Jaina        | 25° 53' | 108° 01' | 125 | Jan-1942 | Aug-2005 | 62 |
| La Concha    | 22° 32' | 105° 27' | 18  | Jan-1961 | Jul-2005 | 43 |
| Sanalona     | 24° 48' | 107° 09' | 118 | Aug-1944 | Jun-2004 | 57 |
| Badiraguato  | 25° 20' | 107° 32' | 208 | Jan-1921 | Feb-2004 | 71 |
| Las Tortugas | 23° 05' | 105° 50' | 38  | Jan-1974 | Jul-2004 | 29 |

---

### Nayarit

|                |         |          |     |          |          |    |
|----------------|---------|----------|-----|----------|----------|----|
| Acaponeta      | 22° 29' | 105° 21' | 31  | Feb-1946 | Dec-2004 | 56 |
| Ahuacatlán     | 21° 03' | 104° 29' | 890 | Sep-1924 | Dec-2003 | 77 |
| Jumatán        | 21° 39' | 105° 02' | 371 | Oct-1942 | Dec-1998 | 46 |
| Las Gaviotas   | 20° 53' | 105° 08' | 50  | Apr-1955 | Dec-2004 | 47 |
| Paso de Arocha | 21° 16' | 105° 04' | 20  | Apr-1949 | Dec-2001 | 52 |
| San Pedro      | 21° 57' | 105° 08' | 24  | Apr-1946 | Dec-2001 | 55 |

---

### Jalisco

|                      |         |          |       |          |          |    |
|----------------------|---------|----------|-------|----------|----------|----|
| Atemajac de Brizuela | 20° 08' | 103° 43' | 2,312 | Jan-1945 | Sep-2004 | 58 |
| Atotonilco           | 20° 33' | 102° 30' | 1,606 | Sep-1942 | May-2005 | 55 |
| Cajón de Peña        | 19° 59' | 105° 07' | 35    | Aug-1954 | May-2005 | 43 |
| Cihuatlán            | 19° 14' | 104° 34' | 13    | Mar-1939 | May-2005 | 53 |
| Cuautitlán           | 19° 27' | 104° 22' | 900   | Jun-1958 | May-2005 | 47 |
| Cuquio               | 20° 56' | 103° 01' | 1,799 | Jun-1943 | May-2005 | 61 |
| Ejutla               | 19° 58' | 104° 02' | 1,120 | Jul-1940 | Dec-2003 | 59 |
| Guadalajara          | 20° 41' | 103° 21' | 1,583 | Jan-1954 | May-2005 | 47 |
| Mascota              | 20° 31' | 104° 49' | 1,235 | Jun-1923 | May-2005 | 77 |
| Puerto Vallarta      | 20° 37' | 105° 15' | 5     | Jun-1926 | Oct-1988 | 59 |

---

### Colima

|                           |         |          |       |          |          |    |
|---------------------------|---------|----------|-------|----------|----------|----|
| Armería                   | 18° 56' | 103° 56' | 30    | Oct-1950 | Apr-2005 | 45 |
| Callejones                | 18° 48' | 103° 37' | 24    | Dec-1948 | May-2005 | 52 |
| Ixtlahuacan               | 19° 00' | 103° 44' | 170   | Sep-1948 | Apr-2005 | 48 |
| Las Peñitas               | 19° 19' | 103° 49' | 450   | Sep-1957 | May-2005 | 42 |
| <b>Michoacán</b>          |         |          |       |          |          |    |
| Apatzingán                | 19° 05' | 102° 16' | 682   | Sep-1922 | Feb-2003 | 74 |
| Corrales                  | 20° 12' | 101° 51' | 1,693 | Oct-1934 | Jul-2003 | 65 |
| El Vaso Infiernillo       | 18° 16' | 101° 53' | 180   | Apr-1965 | Sep-1994 | 27 |
| Santiago Undameo          | 19° 36' | 101° 19' | 2,048 | Dec-1953 | Jun-2004 | 50 |
| Zinapécuaro               | 19° 53' | 100° 40' | 1,920 | Aug-1923 | Dec-2004 | 76 |
| Ciudad Hidalgo            | 19° 42' | 100° 34' | 2,060 | Jun-1922 | Sep-1988 | 66 |
| Uruapan                   | 19° 25' | 102° 04' | 1,634 | Nov-1921 | Sep-1988 | 59 |
| <b>Guerrero</b>           |         |          |       |          |          |    |
| Alcozauca                 | 17° 27' | 98° 23'  | 1,300 | Jun-1926 | Jul-1987 | 37 |
| Atoyac de Álvarez         | 17° 13' | 100° 27' | 240   | Jan-1922 | Jan-1988 | 50 |
| Cacalotenango             | 18° 31' | 99° 39'  | 1,650 | Jan-1947 | Jan-2003 | 53 |
| Ciudad Altamirano         | 18° 21' | 100° 39' | 250   | Mar-1954 | Jun-2005 | 49 |
| Coyuca de Benítez         | 18° 20' | 100° 38' | 7     | Jun-1945 | Jun-1988 | 36 |
| Iguala                    | 18° 20' | 99° 32'  | 800   | Jan-1922 | Dec-2001 | 60 |
| Acapulco                  | 16° 51' | 99° 54'  | 20    | Aug-1972 | Dec-2003 | 34 |
| <b>Oaxaca</b>             |         |          |       |          |          |    |
| Nejapa de Boquilla        | 16° 38' | 95° 57'  | 620   | Jan-1946 | Feb-2004 | 58 |
| Chicapa                   | 16° 34' | 94° 48'  | 35    | Oct-1949 | Feb-2004 | 54 |
| Huajuapán de León         | 17° 48' | 97° 47'  | 1,650 | Jan-1923 | Mar-1973 | 48 |
| Ixtepec                   | 16° 33' | 95° 05'  | 57    | Jun-1948 | Feb-2004 | 55 |
| Santa Catarina Juquila    | 16° 14' | 97° 18'  | 1,265 | Nov-1961 | Dec-2000 | 37 |
| Juchitán de Zaragoza      | 16° 26' | 95° 01'  | 10    | May-1937 | Feb-2004 | 67 |
| Magdalena Jicotlán        | 17° 48' | 97° 28'  | 2,210 | Sep-1954 | Dec-1988 | 30 |
| Matías Romero             | 16° 53' | 95° 02'  | 201   | Jan-1928 | Feb-1995 | 56 |
| Santo Domingo Tehuantepec | 16° 19' | 95° 14'  | 35    | Jan-1941 | Aug-2004 | 58 |
| Magdalena Tetatepec       | 17° 45' | 97° 57'  | 1,780 | Sep-1971 | Apr-2002 | 29 |
| <b>Chiapas</b>            |         |          |       |          |          |    |
| Acala                     | 16° 33' | 92° 48'  | 420   | Apr-1962 | Nov-2004 | 41 |
| Altamirano                | 16° 44' | 92° 02'  | 1,240 | Jun-1942 | Jun-2005 | 62 |
| Aquespala                 | 15° 47' | 91° 55'  | 604   | May-1957 | Jun-2005 | 48 |
| Bochil                    | 16° 59' | 92° 53'  | 1,200 | Mar-1944 | Oct-2005 | 60 |
| Cacahoatan                | 14° 59' | 92° 09'  | 350   | May-1944 | Oct-2005 | 60 |
| Cahuacan                  | 14° 43' | 92° 16'  | 50    | Dec-1961 | Aug-2005 | 43 |
| Chiapilla                 | 16° 34' | 92° 42'  | 550   | Nov-1944 | Sep-2005 | 60 |
| Chicoasén                 | 16° 56' | 93° 05'  | 405   | Jul-1961 | Dec-1999 | 39 |
| El Boquerón               | 16° 38' | 93° 09'  | 500   | Jan-1949 | May-2005 | 56 |
| Ignacio López Rayón       | 14° 37' | 92° 11'  | 7     | Jul-1951 | Aug-2005 | 54 |

|                   |         |         |       |          |          |    |
|-------------------|---------|---------|-------|----------|----------|----|
| Jesús Chiapas     | 15° 52' | 93° 15' | 120   | Sep-1964 | Aug-2003 | 36 |
| <b>Puebla</b>     |         |         |       |          |          |    |
| Piaxtla           | 18° 12' | 98° 15' | 996   | Dec-1925 | Dec-2001 | 75 |
| Tehuacán          | 19° 34' | 97° 34' | 1,705 | Jul-1960 | Oct-1999 | 39 |
| Chiautla de Tapia | 18° 17' | 98° 36' | 1,000 | Oct-1927 | Nov-1993 | 38 |

The columns show (i) the geographic coordinates of each of the 117 stations (latitude and longitude rounded to the nearest minute), (ii) altitude above sea level in meters, (iii) date of the first record, (iv) date of the last record entered into our database, and (v) total number of years with continuous readings (the effective number of seasons used for the analysis).
